# Supplementary material
Source: Springer Nature journal article supplement (https://www.springermedizin.de/resource/supplementary/13058_2009_2440_MOESM2_ESM.pdf/9701414)

Nelsen-Aalen cumulative hazard

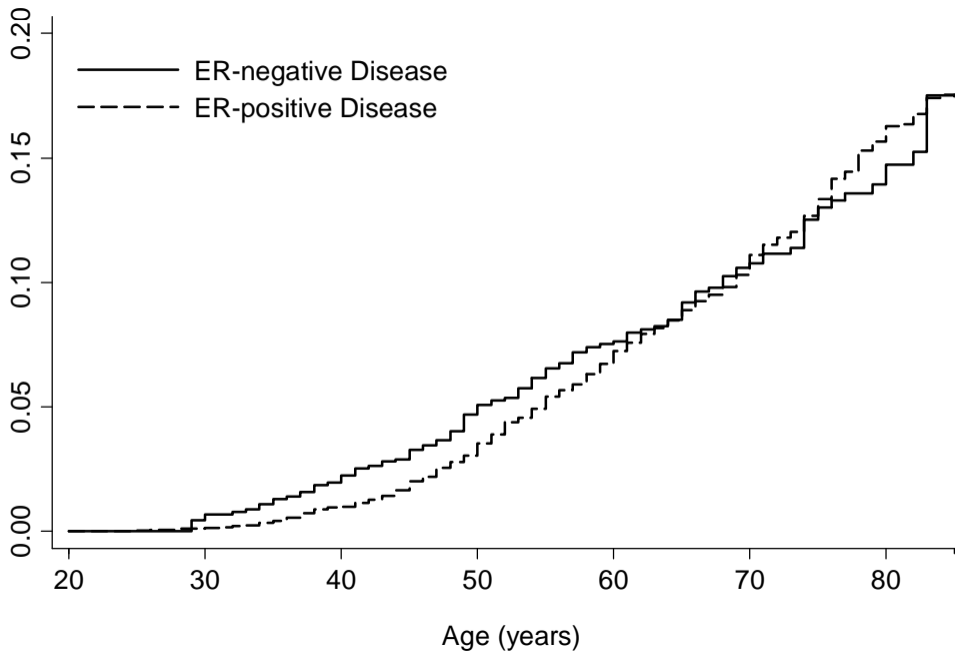

Supplement: MOESM2 [file 9701414]
